# Supplementary material for: Effects of oxygen functional groups and FeCl3 on the evolution of physico-chemical structure in activated carbon obtained from Jixi bituminous coal
Source: Royal Society of Chemistry journal article supplement (doi:10.1039/c7ra12928a), 2018-01-01
Supplement: c7ra12928a1.pdf [file c7ra12928a1.pdf]

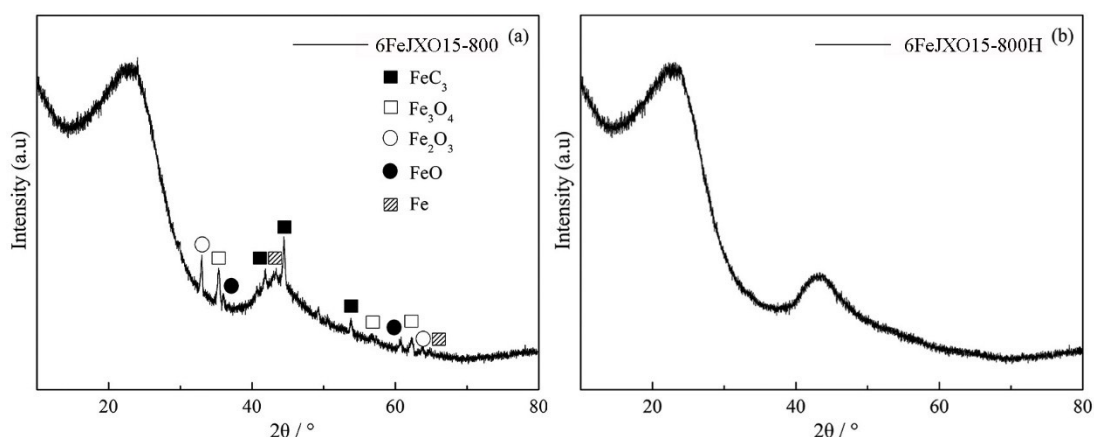

**Fig.S1** XRD phase analysis of 6FeJXO15-800 and 6FeJXO15-800H

There are Fe-based components (such as  $\text{Fe}_3\text{O}_4$ ,  $\text{Fe}_2\text{O}_3$ ,  $\text{FeO}$ ,  $\text{Fe}$  and  $\text{Fe}_3\text{C}$ ) for 6FeJXO15-800, as shown in Fig. S1(a), indicating that  $\text{FeCl}_3$  catalyst has reacted with some substances in coal during pyrolysis. To eliminate the interference of Fe-based compounds in chars for the results of XRD and Raman, some char samples including Fe-based compounds were treated by  $0.2 \text{ mol L}^{-1}$   $\text{HCl}$  and washed with distilled water to remove chloride ions. After acid treatment, the diffraction peak of Fe-based components has disappeared in Fig. S1(b).
